# Supplementary material for: Effect of Implementing Discharge Readiness Assessment in Adult Medical-Surgical Units on 30-Day Return to Hospital: The READI Randomized Clinical Trial
Source: PubMed Central journal article supplement (PMC6484543; doi:10.1001/jamanetworkopen.2018.7387), 2019-01-25
Supplement: jamanetwopen-2-e187387-s002.pdf [file jamanetwopen-2-e187387-s002.pdf]

## Supplementary Online Content

Weiss ME, Yakusheva O, Bobay KL, et al; READI Site Investigators. Effect of implementing discharge readiness assessment in adult medical-surgical units on 30-day return to hospital: the READI randomized clinical trial. *JAMA Netw Open*. 2019;2(1):e187387. doi:10.1001/jamanetworkopen.2018.7387

**eAppendix.** Supplemental Methods

### eReferences

**eTable 1.** Difference-in-Differences Estimates of the Effect of the READI Intervention on 30-Day Post-Discharge Return to Hospital: Full Model

**eTable 2.** Difference-in-Differences Estimates of the Effect of the READI Intervention on 60-Day Post-Discharge Return to Hospital: Full Model

**eTable 3.** Robustness of 30-Day Results, Without Saudi Hospitals (ITT n=137,814; TPP n=121,763)

**eTable 4.** Robustness of 30-Day Results for Units With a Formal Discharge Model of Care in Place Prior to READI Study (ITT n=73,866; TPP n=53,187)

**eTable 5.** Robustness of 30-Day Results for Units Without a Formal Discharge Model of Care in Place Prior to READI Study (ITT n=71,002; TPP n=56,252)

This supplementary material has been provided by the authors to give readers additional information about their work.

## eAppendix: Supplemental Methods

In this supplement, we will first demonstrate the difference-in-differences approach using a hypothetical numerical example, and then we will show how this approach was applied in our study.

A difference-in-differences analysis<sup>1-2</sup> is applicable when a policy or an intervention is evaluated using a pre-/post-comparison method when other confounding trends could potentially affect the outcome of interest. For example, in evaluating whether an introduction of a new readmission reduction initiative in an inpatient unit successfully reduces readmissions, a difference-in-differences analysis will remove concurrent hospital-level readmission reduction efforts, hospital-level quality improvement efforts, and seasonal changes when estimating the effectiveness of the unit-level intervention. In multi-site studies, national policy and spurious global trends can also play a role. Not properly accounting for these contemporaneous trends could lead to spurious results, such as misattributing an observed readmission reduction from an unrelated hospital-level initiative to the unit-level intervention of interest or, alternatively as, misinterpreting globally rising readmission rates as an ineffective intervention.

Intuitively, a difference-in-differences analysis decomposes the observed changes in readmissions into two “differences”. First, it computes changes in the observed outcome from baseline for both the intervention and the control setting (first difference), and then it subtracts the calculated changes in the observed outcome on the control unit (second difference). The hypothetical example below demonstrates how difference-in-differences analysis works:

| <b>Hypothetical Example of the Difference-in-differences approach</b> |                                                      |                          |
|-----------------------------------------------------------------------|------------------------------------------------------|--------------------------|
|                                                                       | <b>Pre-intervention (baseline)</b>                   | <b>Post-intervention</b> |
|                                                                       | <u>Observed outcome data (per 100 discharges)</u>    |                          |
| <b>Control unit</b>                                                   | 10                                                   | 9                        |
| <b>Intervention unit</b>                                              | 8                                                    | 6                        |
|                                                                       | <u>First difference</u>                              |                          |
| <b>Control unit</b>                                                   | [ref]                                                | -1                       |
| <b>Intervention unit</b>                                              | [ref]                                                | -2                       |
|                                                                       | <u>Second difference (difference-in-differences)</u> |                          |
| <b>Control unit</b>                                                   |                                                      |                          |
| <b>Intervention unit</b>                                              | [ref]                                                | -1                       |

When the outcomes data are available at the patient level instead of aggregated at the unit level, a difference-in-differences regression model can be used to obtain the difference-in-differences effect estimates. The regression approach is stronger than a simple unit-level difference-in-differences calculation because it adjusts for patient characteristics directly, instead of assuming that they were the stable across time (pre- and post-intervention) and study conditions (intervention and control). To execute this approach, two new indicator variables are created: one for the Time period (T) for pre- versus post-intervention and one for the Study Condition (SC) for intervention versus control. All patients discharged during the post-intervention period are assigned the value of “1” for the T variable, while all patients discharged during the pre-intervention period are assigned a “0” and represent the reference category for the first difference. Similarly, all patients discharged post-intervention implementation are assigned the value of “1” for the SC variable, with those discharged from the control unit assigned a “0” as reference for the second difference.

|                             |                               | <b>TIME PERIOD (T)</b>                   |                                           |
|-----------------------------|-------------------------------|------------------------------------------|-------------------------------------------|
|                             |                               | <b>Pre-intervention measurement/ “0”</b> | <b>Post-intervention measurement/ “1”</b> |
| <b>STUDY CONDITION (SC)</b> | <b>Control unit/ “0”</b>      | T = 0<br>SC = 0                          | T = 1<br>SC = 0                           |
|                             | <b>Intervention unit/ “1”</b> | T = 0<br>SC = 1                          | T = 1<br>SC = 1                           |

Using “y” to represent the outcome (e.g., readmissions), the difference-in-differences regression is set up as following:

$$\text{Logit } P(y=1) = \text{regression intercept} + \beta_1 (T) + \beta_2 (SC) + \beta_3 [(T) \times (SC)] + X'b \quad [1]$$

where  $P(y=1)$  is the probability that a patient is readmitted, and  $[(T) \times (SC)]$  is the interaction term, or the scalar product of the T and SC indicator variables, and X's are patient control variables times their regression coefficients b's, written in a vector notation. This model is estimated with data grouping at the unit level using a standard logistic regression approach.

In regression model [1], the change in the log-transformed probability of readmission  $P(y)$  from the pre-intervention baseline ( $T=0$ ) to post-intervention ( $T=1$ ) is measured by  $\beta_1 + \beta_3 (SC)$ , and it takes two values depending on the value of SC. For the control unit ( $SC=0$ ), the change in the probability of a readmission is estimated by  $\beta_1$ , and it reflects any readmission trend unrelated to the intervention of interest. For the intervention unit, ( $SC=1$ ) the change in the log-transformed probability of readmission is estimated by  $\beta_1 + \beta_3$ , which can be decomposed into a change due to the unrelated trends,  $\beta_1$ , and a change specific to the intervention unit due to the implementation of the intervention,  $\beta_3$ . Therefore,  $\beta_3$  is a difference-in-differences estimate for which this approach allows one to obtain uncertainty bounds and carry out hypothesis testing as with any other conventional regression coefficient. Note that the difference-in-differences estimate  $\beta_3$  is baseline-adjusted and it is also fully adjusted for patient characteristics.

Applied to testing the effectiveness of the READI intervention, we created three time period indicator variables, T1, T2, and T3, for the three respective sequentially implemented protocols, and a study condition variable SC equal to 1 for patients discharge from the 33 intervention units (0 for patients discharged from the 33 control units). Note that each record has three time period variables, regardless of the record's time period. For instance, an intervention unit record collected during time period 2 will have the values  $T1 = 0$ ,  $T2 = 1$ ,  $T3 = 0$ , and  $SC = 1$ . The below figure illustrates how each indicator would be assigned during each period.

|                          |           | <b>Pre-intervention</b> | <b>READI Protocol 1</b> | <b>READI Protocol 2</b> | <b>READI Protocol 3</b> |
|--------------------------|-----------|-------------------------|-------------------------|-------------------------|-------------------------|
| <b>Control unit</b>      | <b>T1</b> | T1 = 0                  | T1 = 1                  | T1 = 0                  | T1 = 0                  |
|                          | <b>T2</b> | T2 = 0                  | T2 = 0                  | T2 = 1                  | T2 = 0                  |
|                          | <b>T3</b> | T3 = 0                  | T3 = 0                  | T3 = 0                  | T3 = 1                  |
|                          | <b>SC</b> | SC = 0                  | SC = 0                  | SC = 0                  | SC = 0                  |
| <b>Intervention unit</b> | <b>T1</b> | T1 = 0                  | T1 = 1                  | T1 = 0                  | T1 = 0                  |
|                          | <b>T2</b> | T2 = 0                  | T2 = 0                  | T2 = 1                  | T2 = 0                  |
|                          | <b>T3</b> | T3 = 0                  | T3 = 0                  | T3 = 0                  | T3 = 1                  |
|                          | <b>SC</b> | SC = 1                  | SC = 1                  | SC = 1                  | SC = 1                  |

We then created a categorical outcome variable equal to 2 for readmission, 1 for ED/Obs visit without a readmission, and 0 for no-return to hospital (reference), and formulated our multinomial logistic (mLogit) difference-in-differences model the following way:

$$mLogit [P(y=1),P(y=2)] = \text{regression intercept} + \beta_1 (T1) + \beta_2 (T2) + \beta_3 (T3) + \beta_4 (SC) + \beta_5 [(T1) \times (SC)] + \beta_6 [(T2) \times (SC)] + \beta_7 [(T3) \times (SC)] + X'b + h'\zeta. \quad [2]$$

The multinomial logistic regression simultaneously estimates two equations (one for readmission and one for ED/Obs, each relative to the no-outcome baseline), while automatically adjusting for correlated errors and multiple hypothesis testing. In addition to patient controls, our study model includes 33 fixed effects for the study hospitals  $h'\zeta$ . The study model is adjusted for clustering at the hospital and unit level.

In both of the estimated outcome equations,  $\beta_5$ ,  $\beta_6$ , and  $\beta_7$  are the difference-in-differences effect estimates that reflect the change in readmissions and ED/Obs visits caused by each of the three protocols on the intervention units. After estimating the log-transformed model, we derived the average predictive margins<sup>3</sup> for each of the difference-

in-differences estimated for each protocol and tested these margins for significance using two-sided Wald tests at the standard 5% significance level.

## **eREFERENCES**

1. Imbens GW, Rubin DB. Causal inference for statistics, social and biomedical sciences. Cambridge, UK: Cambridge University Press; 2015.
2. Dimick JB, Ryan AM. Methods for evaluating changes in health care policy: The difference-in-differences approach, *JAMA*. 2014; 312(22): 2401-2402.
3. Williams R. Using the margins command to estimate and interpret adjusted predictions and marginal effects. *The Stata Journal*. 2012;12(2):308–331.

Effect of Implementing Discharge Readiness Assessment in Adult Medical-Surgical Units on 30-day Return to Hospital: The READI Randomized Clinical Trial

Weiss ME, Yakusheva O, Bobay KL, Costa L, Hughes RG, Nuccio S, Bahr S,  
Siclován D, Hamilton M, Bang J.

eTables

| eTable 1. Difference-in-Differences estimates of the effect of the READI intervention on 30-day post-discharge return to hospital: Full model |                                        |                                        |                                    |      |                                        |                                        |                                    |      |                                        |                                        |                                    |      |
|-----------------------------------------------------------------------------------------------------------------------------------------------|----------------------------------------|----------------------------------------|------------------------------------|------|----------------------------------------|----------------------------------------|------------------------------------|------|----------------------------------------|----------------------------------------|------------------------------------|------|
|                                                                                                                                               | READI1 <sup>a</sup>                    |                                        |                                    |      | READI2 <sup>b</sup>                    |                                        |                                    |      | READI3 <sup>c</sup>                    |                                        |                                    |      |
|                                                                                                                                               | Intervention                           | Control                                | Difference                         | P    | Intervention                           | Control                                | Difference                         | P    | Intervention                           | Control                                | Difference                         | P    |
|                                                                                                                                               | Adjusted Rate <sup>d</sup><br>(95% CI) | Adjusted Rate <sup>d</sup><br>(95% CI) | Intervention - Control<br>(95% CI) |      | Adjusted Rate <sup>d</sup><br>(95% CI) | Adjusted Rate <sup>d</sup><br>(95% CI) | Intervention - Control<br>(95% CI) |      | Adjusted Rate <sup>d</sup><br>(95% CI) | Adjusted Rate <sup>d</sup><br>(95% CI) | Intervention - Control<br>(95% CI) |      |
| <b>All Units</b>                                                                                                                              |                                        |                                        |                                    |      |                                        |                                        |                                    |      |                                        |                                        |                                    |      |
| <b>ITT</b>                                                                                                                                    |                                        |                                        |                                    |      |                                        |                                        |                                    |      |                                        |                                        |                                    |      |
| <b>Readmission</b>                                                                                                                            | 12.94                                  | 11.92                                  | 1.02                               | 0.03 | 12.23                                  | 12.43                                  | -0.20                              | 0.66 | 12.23                                  | 11.64                                  | 0.59                               | 0.22 |
|                                                                                                                                               | (12.14<br>14.75)                       | (11.46<br>12.39)                       | (0.10<br>1.90)                     |      | (11.46<br>12.99)                       | (1.96<br>12.90)                        | (-1.10<br>0.70)                    |      | (11.76<br>12.69)                       | (11.14<br>12.13)                       | (-0.30<br>1.50)                    |      |
| <b>ED/Obs</b>                                                                                                                                 | 8.45                                   | 9.60                                   | -1.15                              | 0.01 | 8.39                                   | 8.69                                   | -0.29                              | 0.47 | 8.71                                   | 9.35                                   | -0.64                              | 0.14 |
|                                                                                                                                               | (7.76<br>9.15)                         | (9.18<br>10.20)                        | (-2.00<br>-0.30)                   |      | (7.69<br>9.10)                         | (8.29<br>9.09)                         | (-1.10<br>0.50)                    |      | (8.29<br>9.14)                         | (8.90<br>9.79)                         | (-1.50<br>0.20)                    |      |
| <b>TPP</b>                                                                                                                                    |                                        |                                        |                                    |      |                                        |                                        |                                    |      |                                        |                                        |                                    |      |
| <b>Readmission</b>                                                                                                                            | 12.27                                  | 11.83                                  | 0.44                               | 0.46 | 11.32                                  | 12.45                                  | -1.13                              | 0.08 | 12.26                                  | 11.63                                  | 0.63                               | 0.25 |
|                                                                                                                                               | (11.11<br>13.42)                       | (11.20<br>12.46)                       | (-0.80<br>1.60)                    |      | (10.54<br>12.10)                       | (11.58<br>13.31)                       | (-2.40<br>0.2)                     |      | (11.28<br>13.25)                       | (10.91<br>12.35)                       | (-0.50<br>1.70)                    |      |
| <b>ED/Obs</b>                                                                                                                                 | 8.53                                   | 9.64                                   | -1.12                              | 0.07 | 7.99                                   | 8.72                                   | -0.73                              | 0.21 | 8.60                                   | 9.44                                   | -0.84                              | 0.10 |
|                                                                                                                                               | (7.79<br>9.26)                         | (8.84<br>10.45)                        | (-2.30<br>0.10)                    |      | (7.24<br>8.74)                         | (8.30<br>9.14)                         | (-1.90<br>0.40)                    |      | (8.01<br>9.19)                         | (8.90<br>9.98)                         | (-1.90<br>0.20)                    |      |

|                                                  | READI1 <sup>a</sup>                 |                                     |                                 |        | READI2 <sup>b</sup>                 |                                     |                                 |       | READI3 <sup>c</sup>                 |                                     |                                 |      |
|--------------------------------------------------|-------------------------------------|-------------------------------------|---------------------------------|--------|-------------------------------------|-------------------------------------|---------------------------------|-------|-------------------------------------|-------------------------------------|---------------------------------|------|
|                                                  | Intervention                        | Control                             | Difference                      | P      | Intervention                        | Control                             | Difference                      | P     | Intervention                        | Control                             | Difference                      | P    |
|                                                  | Adjusted Rate <sup>d</sup> (95% CI) | Adjusted Rate <sup>d</sup> (95% CI) | Intervention - Control (95% CI) |        | Adjusted Rate <sup>d</sup> (95% CI) | Adjusted Rate <sup>d</sup> (95% CI) | Intervention - Control (95% CI) |       | Adjusted Rate <sup>d</sup> (95% CI) | Adjusted Rate <sup>d</sup> (95% CI) | Intervention - Control (95% CI) |      |
| <b>Unit Baseline Readmission Rate &lt;=11.3%</b> |                                     |                                     |                                 |        |                                     |                                     |                                 |       |                                     |                                     |                                 |      |
| <b>ITT</b>                                       |                                     |                                     |                                 |        |                                     |                                     |                                 |       |                                     |                                     |                                 |      |
| <b>Readmission</b>                               | 12.22                               | 9.63                                | 2.60                            | <0.001 | 10.39                               | 8.98                                | 1.41                            | 0.05  | 10.16                               | 9.37                                | 0.79                            | 0.26 |
|                                                  | (10.71<br>13.74)                    | (8.80<br>10.45)                     | ( 1.40<br>3.80)                 |        | (9.56<br>11.21)                     | (8.11<br>9.84)                      | (0.00<br>2.80)                  |       | (9.01<br>11.30)                     | (8.62<br>10.12)                     | (-0.60<br>2.20)                 |      |
| <b>ED/Obs</b>                                    | 7.02                                | 9.35                                | -2.33                           | <0.001 | 7.55                                | 8.87                                | -1.32                           | 0.02  | 8.06                                | 9.48                                | -1.43                           | 0.02 |
|                                                  | (6.26<br>7.77)                      | (8.61<br>10.09)                     | (-3.50<br>-1.20 )               |        | (6.67<br>8.42)                      | (8.25<br>9.48)                      | (-2.40<br>-0.20)                |       | (7.46<br>8.65)                      | (8.72<br>10.25)                     | (-2.70<br>-0.20)                |      |
| <b>TPP</b>                                       |                                     |                                     |                                 |        |                                     |                                     |                                 |       |                                     |                                     |                                 |      |
| <b>Readmission</b>                               | 11.54                               | 9.53                                | 2.01                            | 0.02   | 9.82                                | 9.03                                | 0.79                            | 0.30  | 10.18                               | 9.38                                | 0.80                            | 0.32 |
|                                                  | (10.07<br>13.01)                    | (8.79<br>10.28)                     | (0.40<br>3.60)                  |        | (8.94<br>10.70)                     | (8.25<br>9.81)                      | (-0.80<br>2.30)                 |       | (8.85<br>11.51)                     | (8.61<br>10.14)                     | (-0.80<br>2.40)                 |      |
| <b>ED/Obs</b>                                    | 7.23                                | 9.39                                | -2.16                           | <0.001 | 7.27                                | 8.97                                | -1.69                           | 0.008 | 8.01                                | 9.62                                | -1.60                           | 0.04 |
|                                                  | (6.29<br>8.17)                      | (8.70<br>10.08)                     | (-3.20<br>-1.10)                |        | (6.40<br>8.15)                      | (8.36<br>9.58)                      | (-3.00<br>-0.40)                |       | (7.26<br>8.77)                      | (8.82<br>10.41)                     | (-3.10<br>-0.10)                |      |
| <b>Unit Baseline Readmission Rate &gt;11.3%</b>  |                                     |                                     |                                 |        |                                     |                                     |                                 |       |                                     |                                     |                                 |      |
| <b>ITT</b>                                       |                                     |                                     |                                 |        |                                     |                                     |                                 |       |                                     |                                     |                                 |      |
| <b>Readmission</b>                               | 13.62                               | 14.33                               | -0.71                           | 0.17   | 14.18                               | 15.97                               | -1.79                           | 0.009 | 14.39                               | 14.00                               | 0.39                            | 0.60 |
|                                                  | (12.38<br>14.85)                    | (13.27<br>15.39)                    | (-1.70<br>0.30)                 |        | (13.41<br>14.95)                    | (14.67<br>17.26)                    | (-3.20<br>-0.40 )               |       | (13.08<br>15.70)                    | (12.72<br>15.29)                    | (-1.10<br>1.90)                 |      |
| <b>ED/Obs</b>                                    | 10.03                               | 9.82                                | 0.21                            | 0.81   | 9.33                                | 8.48                                | 0.86                            | 0.26  | 9.41                                | 9.20                                | 0.21                            | 0.65 |
|                                                  | (9.15<br>10.91)                     | (8.47<br>11.17)                     | (-1.50<br>1.90)                 |        | (8.15<br>10.52)                     | (7.89<br>9.06)                      | (-0.70<br>2.40 )                |       | (8.71<br>10.11)                     | (8.48<br>9.92)                      | (-0.70<br>1.10)                 |      |



|                                                                                                                                                                                                                                                                                                                                                                                                                                                                                                                                                                                                                                                                                                                                                                                                                                                                                                                                                                                                                                                                                                                                                                                                                                                                                                                                                                                                                                                                                                                                                                                                                                                                                                                                                                                                                                                                                                                                                                         | READI1 <sup>a</sup>                    |                                        |                                    |      | READI2 <sup>b</sup>                    |                                        |                                    |        | READI3 <sup>c</sup>                    |                                        |                                    |      |
|-------------------------------------------------------------------------------------------------------------------------------------------------------------------------------------------------------------------------------------------------------------------------------------------------------------------------------------------------------------------------------------------------------------------------------------------------------------------------------------------------------------------------------------------------------------------------------------------------------------------------------------------------------------------------------------------------------------------------------------------------------------------------------------------------------------------------------------------------------------------------------------------------------------------------------------------------------------------------------------------------------------------------------------------------------------------------------------------------------------------------------------------------------------------------------------------------------------------------------------------------------------------------------------------------------------------------------------------------------------------------------------------------------------------------------------------------------------------------------------------------------------------------------------------------------------------------------------------------------------------------------------------------------------------------------------------------------------------------------------------------------------------------------------------------------------------------------------------------------------------------------------------------------------------------------------------------------------------------|----------------------------------------|----------------------------------------|------------------------------------|------|----------------------------------------|----------------------------------------|------------------------------------|--------|----------------------------------------|----------------------------------------|------------------------------------|------|
|                                                                                                                                                                                                                                                                                                                                                                                                                                                                                                                                                                                                                                                                                                                                                                                                                                                                                                                                                                                                                                                                                                                                                                                                                                                                                                                                                                                                                                                                                                                                                                                                                                                                                                                                                                                                                                                                                                                                                                         | Intervention                           | Control                                | Difference                         |      | Intervention                           | Control                                | Difference                         |        | Intervention                           | Control                                | Difference                         |      |
|                                                                                                                                                                                                                                                                                                                                                                                                                                                                                                                                                                                                                                                                                                                                                                                                                                                                                                                                                                                                                                                                                                                                                                                                                                                                                                                                                                                                                                                                                                                                                                                                                                                                                                                                                                                                                                                                                                                                                                         | Adjusted Rate <sup>d</sup><br>(95% CI) | Adjusted Rate <sup>d</sup><br>(95% CI) | Intervention - Control<br>(95% CI) | P    | Adjusted Rate <sup>d</sup><br>(95% CI) | Adjusted Rate <sup>d</sup><br>(95% CI) | Intervention - Control<br>(95% CI) | P      | Adjusted Rate <sup>d</sup><br>(95% CI) | Adjusted Rate <sup>d</sup><br>(95% CI) | Intervention - Control<br>(95% CI) | P    |
| <b>TPP</b>                                                                                                                                                                                                                                                                                                                                                                                                                                                                                                                                                                                                                                                                                                                                                                                                                                                                                                                                                                                                                                                                                                                                                                                                                                                                                                                                                                                                                                                                                                                                                                                                                                                                                                                                                                                                                                                                                                                                                              |                                        |                                        |                                    |      |                                        |                                        |                                    |        |                                        |                                        |                                    |      |
| <b>Readmission</b>                                                                                                                                                                                                                                                                                                                                                                                                                                                                                                                                                                                                                                                                                                                                                                                                                                                                                                                                                                                                                                                                                                                                                                                                                                                                                                                                                                                                                                                                                                                                                                                                                                                                                                                                                                                                                                                                                                                                                      | 12.89                                  | 14.28                                  | -1.38                              | 0.02 | 12.89                                  | 15.94                                  | -3.05                              | <0.001 | 14.46                                  | 13.99                                  | 0.47                               | 0.50 |
|                                                                                                                                                                                                                                                                                                                                                                                                                                                                                                                                                                                                                                                                                                                                                                                                                                                                                                                                                                                                                                                                                                                                                                                                                                                                                                                                                                                                                                                                                                                                                                                                                                                                                                                                                                                                                                                                                                                                                                         | (11.41<br>14.37)                       | (13.31<br>15.25)                       | (-2.50<br>-0.30)                   |      | (12.13<br>13.66)                       | (14.64<br>17.24)                       | (-4.50<br>-1.60)                   |        | (13.05<br>15.86)                       | (12.80<br>15.18)                       | (-0.90<br>1.90)                    |      |
| <b>ED/Obs</b>                                                                                                                                                                                                                                                                                                                                                                                                                                                                                                                                                                                                                                                                                                                                                                                                                                                                                                                                                                                                                                                                                                                                                                                                                                                                                                                                                                                                                                                                                                                                                                                                                                                                                                                                                                                                                                                                                                                                                           | 10.00                                  | 9.88                                   | 0.12                               | 0.90 | 8.79                                   | 8.45                                   | 0.35                               | 0.68   | 9.20                                   | 9.25                                   | -0.06                              | 0.91 |
|                                                                                                                                                                                                                                                                                                                                                                                                                                                                                                                                                                                                                                                                                                                                                                                                                                                                                                                                                                                                                                                                                                                                                                                                                                                                                                                                                                                                                                                                                                                                                                                                                                                                                                                                                                                                                                                                                                                                                                         | (8.98<br>11.03)                        | (8.45<br>11.32)                        | (-1.90<br>2.10)                    |      | (7.69<br>9.90)                         | (7.90<br>8.99)                         | (-1.40<br>2.10)                    |        | (8.30<br>10.10)                        | (8.55<br>9.96)                         | (-1.10<br>0.90)                    |      |
| <p>Abbreviations: "Difference." = fully adjusted difference between intervention (I) and control units (C); "Readmission" = Inpatient readmission; ED/Obs" = Emergency Department / Observation visit; "ITT" = Intent to treat; "TPP" = treated per protocol.</p> <p>a READI1: Readiness Evaluation And Discharge Interventions Protocol 1: Nurse assessment using nurse form of the Readiness for Hospital Discharge Scale with instruction to nurses to use their best judgment with the assessment information to guide actions in completing their patients' preparation for discharge .</p> <p>b READI2: Readiness Evaluation And Discharge Interventions Protocol 2: Patient self-assessment using the patient form of the Readiness for Hospital Discharge Scale followed by nurse assessment using the nurse form of the Readiness for Hospital Discharge Scale with instruction to nurses to use their best judgment with the assessment information to guide actions in completing their patients' preparation for discharge .</p> <p>c READI3: Readiness Evaluation And Discharge Interventions Protocol 3: Patient self-assessment using the patient form of the Readiness for Hospital Discharge Scale followed by nurse assessment using the nurse form of the Readiness for Hospital Discharge Scale with instruction to nurses to act and document nurse actions if low readiness score (&lt;7) on nurse or patient form.</p> <p>d Adjusted for baseline and patient characteristics. Rates expressed per 100 index patient discharges. Adjusted rates and adjusted difference in rates were estimated using a multinomial logistic regression with adjustment for baseline event rates and patient characteristics and clustering at unit and hospital level.</p> <p>‡ ED/Obs: Emergency Department visit or Observation stay with no record of readmission. ED and Observation were combined as return to hospital without inpatient readmission.</p> |                                        |                                        |                                    |      |                                        |                                        |                                    |        |                                        |                                        |                                    |      |

| <b>eTable 2. Difference-in-Differences estimates of the effect of the READI intervention on 60-day post-discharge return to hospital: Full model</b> |                                           |                                           |                                        |          |                                           |                                           |                                        |          |                                           |                                           |                                        |          |
|------------------------------------------------------------------------------------------------------------------------------------------------------|-------------------------------------------|-------------------------------------------|----------------------------------------|----------|-------------------------------------------|-------------------------------------------|----------------------------------------|----------|-------------------------------------------|-------------------------------------------|----------------------------------------|----------|
|                                                                                                                                                      | <b>READI1<sup>a</sup></b>                 |                                           |                                        |          | <b>READI2<sup>b</sup></b>                 |                                           |                                        |          | <b>READI3<sup>c</sup></b>                 |                                           |                                        |          |
|                                                                                                                                                      | <b>Intervention</b>                       | <b>Control</b>                            | <b>Difference</b>                      | <b>P</b> | <b>Intervention</b>                       | <b>Control</b>                            | <b>Difference</b>                      | <b>P</b> | <b>Intervention</b>                       | <b>Control</b>                            | <b>Difference</b>                      | <b>P</b> |
|                                                                                                                                                      | <b>Adjusted Rate<sup>d</sup> (95% CI)</b> | <b>Adjusted Rate<sup>d</sup> (95% CI)</b> | <b>Intervention - Control (95% CI)</b> |          | <b>Adjusted Rate<sup>d</sup> (95% CI)</b> | <b>Adjusted Rate<sup>d</sup> (95% CI)</b> | <b>Intervention - Control (95% CI)</b> |          | <b>Adjusted Rate<sup>d</sup> (95% CI)</b> | <b>Adjusted Rate<sup>d</sup> (95% CI)</b> | <b>Intervention - Control (95% CI)</b> |          |
| <b>All</b>                                                                                                                                           |                                           |                                           |                                        |          |                                           |                                           |                                        |          |                                           |                                           |                                        |          |
| <b>ITT</b>                                                                                                                                           |                                           |                                           |                                        |          |                                           |                                           |                                        |          |                                           |                                           |                                        |          |
| <b>Readmission</b>                                                                                                                                   | 17.67                                     | 17.26                                     | 0.41                                   | 0.50     | 17.17                                     | 17.41                                     | -0.25                                  | 0.72     | 17.08                                     | 16.55                                     | 0.53                                   | 0.32     |
|                                                                                                                                                      | (16.51<br>18.84)                          | (16.50<br>18.02)                          | (-0.80<br>1.60)                        |          | (16.31<br>18.02)                          | (16.39<br>18.43)                          | (-1.60<br>1.10)                        |          | (16.09<br>18.07)                          | (15.75<br>17.34)                          | (-0.60<br>1.60)                        |          |
| <b>ED/Obs</b>                                                                                                                                        | 10.53                                     | 11.68                                     | -1.15                                  | 0.10     | 10.41                                     | 10.89                                     | -0.47                                  | 0.41     | 10.91                                     | 11.32                                     | -0.41                                  | 0.51     |
|                                                                                                                                                      | (9.81<br>11.26)                           | (10.82<br>12.84)                          | (-2.50<br>0.20)                        |          | (9.45<br>11.37)                           | (10.41<br>11.37)                          | (-1.60<br>0.70)                        |          | (10.38<br>11.43)                          | (10.72<br>11.92)                          | (-1.70<br>0.90)                        |          |
| <b>TPP</b>                                                                                                                                           |                                           |                                           |                                        |          |                                           |                                           |                                        |          |                                           |                                           |                                        |          |
| <b>Readmission</b>                                                                                                                                   | 17.67                                     | 17.26                                     | 0.41                                   | 0.50     | 17.17                                     | 17.41                                     | -0.25                                  | 0.72     | 17.08                                     | 16.55                                     | 0.53                                   | 0.32     |
|                                                                                                                                                      | (16.51<br>18.84)                          | (16.50<br>18.02)                          | (-0.80<br>1.60)                        |          | (16.31<br>18.02)                          | (16.39<br>18.43)                          | (-1.60<br>1.10)                        |          | (16.09<br>18.07)                          | (15.75<br>17.34)                          | (-0.60<br>1.60)                        |          |
| <b>ED/Obs</b>                                                                                                                                        | 10.53                                     | 11.68                                     | -1.15                                  | 0.10     | 10.41                                     | 10.89                                     | -0.47                                  | 0.41     | 10.91                                     | 11.32                                     | -0.41                                  | 0.51     |
|                                                                                                                                                      | (9.81<br>11.26)                           | (10.82<br>12.84)                          | (-2.50<br>0.20)                        |          | (9.45<br>11.37)                           | (10.41<br>11.37)                          | (-1.60<br>0.70)                        |          | (10.38<br>11.43)                          | (10.72<br>11.92)                          | (-1.70<br>0.90)                        |          |
| <b>Unit Baseline Readmission Rate &lt;=11.3%</b>                                                                                                     |                                           |                                           |                                        |          |                                           |                                           |                                        |          |                                           |                                           |                                        |          |
| <b>ITT</b>                                                                                                                                           |                                           |                                           |                                        |          |                                           |                                           |                                        |          |                                           |                                           |                                        |          |
| <b>Readmission</b>                                                                                                                                   | 17.67                                     | 17.26                                     | 0.41                                   | 0.50     | 17.17                                     | 17.41                                     | -0.25                                  | 0.72     | 17.08                                     | 16.55                                     | 0.53                                   | 0.32     |
|                                                                                                                                                      | (16.51<br>18.84)                          | (16.50<br>18.02)                          | (-0.80<br>1.60)                        |          | (16.31<br>18.02)                          | (16.39<br>18.43)                          | (-1.60<br>1.10)                        |          | (16.09<br>18.07)                          | (15.75<br>17.34)                          | (-0.60<br>1.60)                        |          |
| <b>ED/Obs</b>                                                                                                                                        | 10.53                                     | 11.68                                     | -1.15                                  | 0.10     | 10.41                                     | 10.89                                     | -0.47                                  | 0.41     | 10.91                                     | 11.32                                     | -0.41                                  | 0.51     |
|                                                                                                                                                      | (9.81<br>11.26)                           | (10.82<br>12.84)                          | (-2.50<br>0.20)                        |          | (9.45<br>11.37)                           | (10.41<br>11.37)                          | (-1.60<br>0.70)                        |          | (10.38<br>11.43)                          | (10.72<br>11.92)                          | (-1.70<br>0.90)                        |          |

|                                                 | READI1 <sup>a</sup>                    |                                        |                                    |       | READI2 <sup>b</sup>                    |                                        |                                    |        | READI3 <sup>c</sup>                    |                                        |                                    |      |
|-------------------------------------------------|----------------------------------------|----------------------------------------|------------------------------------|-------|----------------------------------------|----------------------------------------|------------------------------------|--------|----------------------------------------|----------------------------------------|------------------------------------|------|
|                                                 | Intervention                           | Control                                | Difference                         | P     | Intervention                           | Control                                | Difference                         | P      | Intervention                           | Control                                | Difference                         | P    |
|                                                 | Adjusted Rate <sup>d</sup><br>(95% CI) | Adjusted Rate <sup>d</sup><br>(95% CI) | Intervention - Control<br>(95% CI) |       | Adjusted Rate <sup>d</sup><br>(95% CI) | Adjusted Rate <sup>d</sup><br>(95% CI) | Intervention - Control<br>(95% CI) |        | Adjusted Rate <sup>d</sup><br>(95% CI) | Adjusted Rate <sup>d</sup><br>(95% CI) | Intervention - Control<br>(95% CI) |      |
| <b>TPP</b>                                      |                                        |                                        |                                    |       |                                        |                                        |                                    |        |                                        |                                        |                                    |      |
| <b>Readmission</b>                              | 15.23                                  | 13.89                                  | 1.35                               | 0.19  | 14.09                                  | 13.24                                  | 0.85                               | 0.37   | 14.10                                  | 13.29                                  | 0.82                               | 0.31 |
|                                                 | (13.47<br>17.00)                       | (13.25<br>14.52)                       | (-0.70<br>3.40)                    |       | (13.06<br>15.11)                       | (12.25<br>14.43)                       | (-1.10<br>2.80)                    |        | (12.39<br>15.82)                       | (12.48<br>14.09)                       | (-0.80<br>2.40)                    |      |
| <b>ED/Obs</b>                                   | 9.50                                   | 11.11                                  | -1.62                              | 0.04  | 9.81                                   | 11.04                                  | -1.23                              | 0.10   | 10.29                                  | 11.12                                  | -0.84                              | 0.39 |
|                                                 | (8.58<br>10.42)                        | (10.22<br>12.01)                       | (-3.10<br>-0.10)                   |       | (8.75<br>10.88)                        | (10.45<br>11.62)                       | (-2.70<br>0.20)                    |        | (9.33<br>11.24)                        | (10.44<br>11.81)                       | (-2.80<br>1.10)                    |      |
| <b>Unit Baseline Readmission Rate &gt;11.3%</b> |                                        |                                        |                                    |       |                                        |                                        |                                    |        |                                        |                                        |                                    |      |
| <b>ITT</b>                                      |                                        |                                        |                                    |       |                                        |                                        |                                    |        |                                        |                                        |                                    |      |
| <b>Readmission<sup>f</sup></b>                  | 19.18                                  | 20.66                                  | -1.48                              | 0.02  | 19.78                                  | 21.81                                  | -2.03                              | 0.02   | 20.32                                  | 19.96                                  | 0.36                               | 0.62 |
|                                                 | (17.82<br>20.53)                       | (19.41<br>21.91)                       | (-2.70<br>-0.20)                   |       | (18.99<br>20.57)                       | (20.32<br>23.30)                       | (-3.70<br>-0.4)                    |        | (18.97<br>21.67)                       | (18.59<br>21.33)                       | (-1.10<br>1.90)                    |      |
| <b>ED/Obs</b>                                   | 11.91                                  | 12.29                                  | -0.38                              | 0.69  | 10.88                                  | 10.86                                  | 0.02                               | 0.98   | 11.39                                  | 11.67                                  | -0.28                              | 0.74 |
|                                                 | (10.86<br>12.96)                       | (10.89<br>13.67)                       | (-2.30<br>1.60)                    |       | (9.36<br>12.40)                        | (10.17<br>11.54)                       | (-1.60<br>1.70)                    |        | (10.79<br>12.00)                       | (10.72<br>12.63)                       | (-2.00<br>1.40)                    |      |
| <b>TPP</b>                                      |                                        |                                        |                                    |       |                                        |                                        |                                    |        |                                        |                                        |                                    |      |
| <b>Readmission</b>                              | 18.39                                  | 20.63                                  | -2.24                              | 0.003 | 18.13                                  | 21.76                                  | -3.63                              | <0.001 | 20.22                                  | 19.96                                  | 0.26                               | 0.71 |
|                                                 | (16.43<br>20.36)                       | (19.53<br>21.73)                       | (-3.70<br>-0.80)                   |       | (17.40<br>18.86)                       | (20.24<br>23.29)                       | (-5.10<br>-2.20)                   |        | (18.76<br>21.68)                       | (18.75<br>21.16)                       | (-1.20<br>1.70)                    |      |
| <b>ED/obs</b>                                   | 11.85                                  | 12.35                                  | -0.50                              | 0.65  | 10.54                                  | 10.80                                  | -0.26                              | 0.77   | 11.52                                  | 11.69                                  | -0.17                              | 0.84 |
|                                                 | (10.54<br>13.15)                       | (10.85<br>13.85)                       | (-2.70<br>1.70)                    |       | (9.07<br>12.01)                        | (10.14<br>11.47)                       | (-2.10<br>1.60)                    |        | (10.62<br>12.42)                       | (10.78<br>12.59)                       | (-1.90<br>1.50)                    |      |

Abbreviations: "Difference." = fully adjusted difference between intervention (I) and control units (C); "Readmission" = Inpatient readmission; ED/Obs" = Emergency Department / Observation visit; "ITT" = Intent to treat; "TPP" = treated per protocol.

a READI1: Readiness Evaluation And Discharge Interventions Protocol 1: Nurse assessment using nurse form of the Readiness for Hospital Discharge Scale with instruction to nurses to use their best judgment with the assessment information to guide actions in completing their patients' preparation for discharge .

b READI2: Readiness Evaluation And Discharge Interventions Protocol 2: Patient self-assessment using the patient form of the Readiness for Hospital Discharge Scale followed by nurse assessment using the nurse form of the Readiness for Hospital Discharge Scale with instruction to nurses to use their best judgment with the assessment information to guide actions in completing their patients' preparation for discharge .

c READI3: Readiness Evaluation And Discharge Interventions Protocol 3: Patient self-assessment using the patient form of the Readiness for Hospital Discharge Scale followed by nurse assessment using the nurse form of the Readiness for Hospital Discharge Scale with instruction to nurses to act and document nurse actions if low readiness score (<7) on nurse or patient form.

d Adjusted for baseline and patient characteristics. Rates expressed per 100 index patient discharges. Adjusted rates and adjusted difference in rates were estimated using a multinomial logistic regression with adjustment for baseline event rates and patient characteristics and clustering at unit and hospital level.

‡ ED/Obs: Emergency Department visit or Observation stay with no record of readmission. ED and Observation were combined as return to hospital without inpatient readmission.

| <b>eTable 3. Robustness of 30-day results, without Saudi Hospitals (ITT n=137,814; TPP n=121,763)</b>                                                                                                                                                                                                                                                                                                                                                                                                                                                                                                                                                                                                                                                                                                                                                                                                                                                                                                                                                                                                                                                                                                                                                                                                                                                                                                                                                                                                                                                                                                                                                                                                                                                                                                                                                                                                                                                                              |                                    |                                    |                                    |                                    |                                    |                                    |                                    |                                    |                                    |
|------------------------------------------------------------------------------------------------------------------------------------------------------------------------------------------------------------------------------------------------------------------------------------------------------------------------------------------------------------------------------------------------------------------------------------------------------------------------------------------------------------------------------------------------------------------------------------------------------------------------------------------------------------------------------------------------------------------------------------------------------------------------------------------------------------------------------------------------------------------------------------------------------------------------------------------------------------------------------------------------------------------------------------------------------------------------------------------------------------------------------------------------------------------------------------------------------------------------------------------------------------------------------------------------------------------------------------------------------------------------------------------------------------------------------------------------------------------------------------------------------------------------------------------------------------------------------------------------------------------------------------------------------------------------------------------------------------------------------------------------------------------------------------------------------------------------------------------------------------------------------------------------------------------------------------------------------------------------------------|------------------------------------|------------------------------------|------------------------------------|------------------------------------|------------------------------------|------------------------------------|------------------------------------|------------------------------------|------------------------------------|
|                                                                                                                                                                                                                                                                                                                                                                                                                                                                                                                                                                                                                                                                                                                                                                                                                                                                                                                                                                                                                                                                                                                                                                                                                                                                                                                                                                                                                                                                                                                                                                                                                                                                                                                                                                                                                                                                                                                                                                                    | ALL                                |                                    |                                    | High-readmission units             |                                    |                                    | Low-readmission units              |                                    |                                    |
|                                                                                                                                                                                                                                                                                                                                                                                                                                                                                                                                                                                                                                                                                                                                                                                                                                                                                                                                                                                                                                                                                                                                                                                                                                                                                                                                                                                                                                                                                                                                                                                                                                                                                                                                                                                                                                                                                                                                                                                    | READI1 <sup>a</sup>                | READI2 <sup>b</sup>                | READI3 <sup>c</sup>                | READI1 <sup>a</sup>                | READI2 <sup>b</sup>                | READI3 <sup>c</sup>                | READI1 <sup>a</sup>                | READI2 <sup>b</sup>                | READI3 <sup>c</sup>                |
|                                                                                                                                                                                                                                                                                                                                                                                                                                                                                                                                                                                                                                                                                                                                                                                                                                                                                                                                                                                                                                                                                                                                                                                                                                                                                                                                                                                                                                                                                                                                                                                                                                                                                                                                                                                                                                                                                                                                                                                    | Difference<br>(95% CI)<br><i>P</i> | Difference<br>(95% CI)<br><i>P</i> | Difference<br>(95% CI)<br><i>P</i> | Difference<br>(95% CI)<br><i>P</i> | Difference<br>(95% CI)<br><i>P</i> | Difference<br>(95% CI)<br><i>P</i> | Difference<br>(95% CI)<br><i>P</i> | Difference<br>(95% CI)<br><i>P</i> | Difference<br>(95% CI)<br><i>P</i> |
| <b>ITT</b>                                                                                                                                                                                                                                                                                                                                                                                                                                                                                                                                                                                                                                                                                                                                                                                                                                                                                                                                                                                                                                                                                                                                                                                                                                                                                                                                                                                                                                                                                                                                                                                                                                                                                                                                                                                                                                                                                                                                                                         |                                    |                                    |                                    |                                    |                                    |                                    |                                    |                                    |                                    |
| <b>Readmission</b>                                                                                                                                                                                                                                                                                                                                                                                                                                                                                                                                                                                                                                                                                                                                                                                                                                                                                                                                                                                                                                                                                                                                                                                                                                                                                                                                                                                                                                                                                                                                                                                                                                                                                                                                                                                                                                                                                                                                                                 | 0.91                               | -0.28                              | 0.49                               | -0.71                              | -1.79                              | 0.38                               | 2.53                               | 1.38                               | 0.62                               |
|                                                                                                                                                                                                                                                                                                                                                                                                                                                                                                                                                                                                                                                                                                                                                                                                                                                                                                                                                                                                                                                                                                                                                                                                                                                                                                                                                                                                                                                                                                                                                                                                                                                                                                                                                                                                                                                                                                                                                                                    | (-0.13<br>1.95)                    | (-1.43<br>0.86)                    | (-0.58<br>1.56)                    | (-1.73<br>0.32)                    | (-3.19<br>0.39)                    | (-1.12<br>1.88)                    | (1.19<br>3.87)                     | (-0.12<br>2.89)                    | (-0.89<br>2.14)                    |
|                                                                                                                                                                                                                                                                                                                                                                                                                                                                                                                                                                                                                                                                                                                                                                                                                                                                                                                                                                                                                                                                                                                                                                                                                                                                                                                                                                                                                                                                                                                                                                                                                                                                                                                                                                                                                                                                                                                                                                                    | <i>0.08</i>                        | <i>0.62</i>                        | <i>0.36</i>                        | <i>0.17</i>                        | <i>0.01*</i>                       | <i>0.61</i>                        | <i>&lt;0.001**</i>                 | <i>0.07</i>                        | <i>0.41</i>                        |
| <b>ED/Obs</b>                                                                                                                                                                                                                                                                                                                                                                                                                                                                                                                                                                                                                                                                                                                                                                                                                                                                                                                                                                                                                                                                                                                                                                                                                                                                                                                                                                                                                                                                                                                                                                                                                                                                                                                                                                                                                                                                                                                                                                      | -0.90                              | -0.04                              | -0.31                              | 0.22                               | 0.85                               | 0.24                               | -2.00                              | -0.92                              | -0.87                              |
|                                                                                                                                                                                                                                                                                                                                                                                                                                                                                                                                                                                                                                                                                                                                                                                                                                                                                                                                                                                                                                                                                                                                                                                                                                                                                                                                                                                                                                                                                                                                                                                                                                                                                                                                                                                                                                                                                                                                                                                    | (-2.03<br>0.24)                    | (-1.08<br>0.99)                    | (-1.12<br>0.51)                    | (-1.46<br>1.91)                    | (-0.70<br>2.39)                    | (-0.68<br>1.15)                    | (-3.26<br>-0.74)                   | (-2.02<br>0.19)                    | (-2.06<br>0.32)                    |
|                                                                                                                                                                                                                                                                                                                                                                                                                                                                                                                                                                                                                                                                                                                                                                                                                                                                                                                                                                                                                                                                                                                                                                                                                                                                                                                                                                                                                                                                                                                                                                                                                                                                                                                                                                                                                                                                                                                                                                                    | <i>0.12</i>                        | <i>0.93</i>                        | <i>0.45</i>                        | <i>0.79</i>                        | <i>0.27</i>                        | <i>0.6</i>                         | <i>0.002**</i>                     | <i>0.10</i>                        | <i>0.55</i>                        |
| <b>TPP</b>                                                                                                                                                                                                                                                                                                                                                                                                                                                                                                                                                                                                                                                                                                                                                                                                                                                                                                                                                                                                                                                                                                                                                                                                                                                                                                                                                                                                                                                                                                                                                                                                                                                                                                                                                                                                                                                                                                                                                                         |                                    |                                    |                                    |                                    |                                    |                                    |                                    |                                    |                                    |
| <b>Readmission</b>                                                                                                                                                                                                                                                                                                                                                                                                                                                                                                                                                                                                                                                                                                                                                                                                                                                                                                                                                                                                                                                                                                                                                                                                                                                                                                                                                                                                                                                                                                                                                                                                                                                                                                                                                                                                                                                                                                                                                                 | 0.30                               | -1.24                              | 0.48                               | -1.38                              | -3.03                              | 0.46                               | 1.93                               | 0.73                               | 0.52                               |
|                                                                                                                                                                                                                                                                                                                                                                                                                                                                                                                                                                                                                                                                                                                                                                                                                                                                                                                                                                                                                                                                                                                                                                                                                                                                                                                                                                                                                                                                                                                                                                                                                                                                                                                                                                                                                                                                                                                                                                                    | (-0.94<br>1.54)                    | (-2.59<br>0.11)                    | (-0.63<br>1.59)                    | (-2.51<br>0.25)                    | (-4.50<br>-1.57)                   | (-0.93<br>1.84)                    | (0.14<br>3.73)                     | (-0.99<br>2.45)                    | (-1.21<br>2.24)                    |
|                                                                                                                                                                                                                                                                                                                                                                                                                                                                                                                                                                                                                                                                                                                                                                                                                                                                                                                                                                                                                                                                                                                                                                                                                                                                                                                                                                                                                                                                                                                                                                                                                                                                                                                                                                                                                                                                                                                                                                                    | <i>0.62</i>                        | <i>0.07</i>                        | <i>0.38</i>                        | <i>0.02*</i>                       | <i>&lt;0.001**</i>                 | <i>0.50</i>                        | <i>0.04*</i>                       | <i>0.39</i>                        | <i>0.55</i>                        |
| <b>ED/Obs.</b>                                                                                                                                                                                                                                                                                                                                                                                                                                                                                                                                                                                                                                                                                                                                                                                                                                                                                                                                                                                                                                                                                                                                                                                                                                                                                                                                                                                                                                                                                                                                                                                                                                                                                                                                                                                                                                                                                                                                                                     | -0.87                              | -0.49                              | -0.48                              | 0.13                               | 0.34                               | -0.03                              | -1.83                              | -1.31                              | -0.95                              |
|                                                                                                                                                                                                                                                                                                                                                                                                                                                                                                                                                                                                                                                                                                                                                                                                                                                                                                                                                                                                                                                                                                                                                                                                                                                                                                                                                                                                                                                                                                                                                                                                                                                                                                                                                                                                                                                                                                                                                                                    | (-2.09<br>0.36)                    | (-1.68<br>0.69)                    | (-1.45<br>0.48)                    | (-1.88<br>2.15)                    | (-1.38<br>2.06)                    | (-1.04<br>0.99)                    | (-2.98<br>-0.69)                   | (-2.70<br>0.07)                    | (-2.46<br>0.59)                    |
|                                                                                                                                                                                                                                                                                                                                                                                                                                                                                                                                                                                                                                                                                                                                                                                                                                                                                                                                                                                                                                                                                                                                                                                                                                                                                                                                                                                                                                                                                                                                                                                                                                                                                                                                                                                                                                                                                                                                                                                    | <i>0.16</i>                        | <i>0.40</i>                        | <i>0.31</i>                        | <i>0.89</i>                        | <i>0.69</i>                        | <i>0.96</i>                        | <i>0.002**</i>                     | <i>0.06</i>                        | <i>0.22</i>                        |
| <p>Abbreviations: "Difference." = fully adjusted difference between intervention (I) and control units (C); "Readmission" = Inpatient readmission; ED/Obs" = Emergency Department / Observation visit; "ITT" = Intent to treat; "TPP" = treated per protocol.</p> <p>a READI1: Readiness Evaluation And Discharge Interventions Protocol 1: Nurse assessment using nurse form of the Readiness for Hospital Discharge Scale with instruction to nurses to use their best judgment with the assessment information to guide actions in completing their patients' preparation for discharge .</p> <p>b READI2: Readiness Evaluation And Discharge Interventions Protocol 2: Patient self-assessment using the patient form of the Readiness for Hospital Discharge Scale followed by nurse assessment using the nurse form of the Readiness for Hospital Discharge Scale with instruction to nurses to use their best judgment with the assessment information to guide actions in completing their patients' preparation for discharge .</p> <p>c READI3: Readiness Evaluation And Discharge Interventions Protocol 3: Patient self-assessment using the patient form of the Readiness for Hospital Discharge Scale followed by nurse assessment using the nurse form of the Readiness for Hospital Discharge Scale with instruction to nurses to act and document nurse actions if low readiness score (&lt;7) on nurse or patient form.</p> <p>d Adjusted for baseline and patient characteristics. Rates expressed per 100 index patient discharges. Adjusted rates and adjusted difference in rates were estimated using a multinomial logistic regression with adjustment for baseline event rates and patient characteristics and clustering at unit and hospital level.</p> <p><sup>‡</sup> ED/Obs: Emergency Department visit or Observation stay with no record of readmission. ED and Observation were combined as return to hospital without inpatient readmission.</p> |                                    |                                    |                                    |                                    |                                    |                                    |                                    |                                    |                                    |

| <b>eTable 4. Robustness of 30-day results for units with a formal discharge model of care in place prior to READI study (ITT n=73,866; TPP n=53,187)</b>                                                                                                                                                                                                                                                                                                                                                                                                                                                                                                                                                                                                                                                                                                                                                                                                                                                                                                                                                                                                                                                                                                                                                                                                                                                                                                                                                                                                                                                                                                                                                                                                                                                                                                                                                                                                                |                                             |                                             |                                             |                                             |                                             |                                             |                                             |                                             |                                             |
|-------------------------------------------------------------------------------------------------------------------------------------------------------------------------------------------------------------------------------------------------------------------------------------------------------------------------------------------------------------------------------------------------------------------------------------------------------------------------------------------------------------------------------------------------------------------------------------------------------------------------------------------------------------------------------------------------------------------------------------------------------------------------------------------------------------------------------------------------------------------------------------------------------------------------------------------------------------------------------------------------------------------------------------------------------------------------------------------------------------------------------------------------------------------------------------------------------------------------------------------------------------------------------------------------------------------------------------------------------------------------------------------------------------------------------------------------------------------------------------------------------------------------------------------------------------------------------------------------------------------------------------------------------------------------------------------------------------------------------------------------------------------------------------------------------------------------------------------------------------------------------------------------------------------------------------------------------------------------|---------------------------------------------|---------------------------------------------|---------------------------------------------|---------------------------------------------|---------------------------------------------|---------------------------------------------|---------------------------------------------|---------------------------------------------|---------------------------------------------|
|                                                                                                                                                                                                                                                                                                                                                                                                                                                                                                                                                                                                                                                                                                                                                                                                                                                                                                                                                                                                                                                                                                                                                                                                                                                                                                                                                                                                                                                                                                                                                                                                                                                                                                                                                                                                                                                                                                                                                                         | <b>ALL</b>                                  |                                             |                                             | <b>High-readmission units</b>               |                                             |                                             | <b>Low-readmission units</b>                |                                             |                                             |
|                                                                                                                                                                                                                                                                                                                                                                                                                                                                                                                                                                                                                                                                                                                                                                                                                                                                                                                                                                                                                                                                                                                                                                                                                                                                                                                                                                                                                                                                                                                                                                                                                                                                                                                                                                                                                                                                                                                                                                         | <b>READI1<sup>a</sup></b>                   | <b>READI2<sup>b</sup></b>                   | <b>READI3<sup>c</sup></b>                   | <b>READI1<sup>a</sup></b>                   | <b>READI2<sup>b</sup></b>                   | <b>READI3<sup>c</sup></b>                   | <b>READI1<sup>a</sup></b>                   | <b>READI2<sup>b</sup></b>                   | <b>READI3<sup>c</sup></b>                   |
|                                                                                                                                                                                                                                                                                                                                                                                                                                                                                                                                                                                                                                                                                                                                                                                                                                                                                                                                                                                                                                                                                                                                                                                                                                                                                                                                                                                                                                                                                                                                                                                                                                                                                                                                                                                                                                                                                                                                                                         | <b>Difference<br/>(95% CI)<br/><i>P</i></b> | <b>Difference<br/>(95% CI)<br/><i>P</i></b> | <b>Difference<br/>(95% CI)<br/><i>P</i></b> | <b>Difference<br/>(95% CI)<br/><i>P</i></b> | <b>Difference<br/>(95% CI)<br/><i>P</i></b> | <b>Difference<br/>(95% CI)<br/><i>P</i></b> | <b>Difference<br/>(95% CI)<br/><i>P</i></b> | <b>Difference<br/>(95% CI)<br/><i>P</i></b> | <b>Difference<br/>(95% CI)<br/><i>P</i></b> |
| <b>ITT</b>                                                                                                                                                                                                                                                                                                                                                                                                                                                                                                                                                                                                                                                                                                                                                                                                                                                                                                                                                                                                                                                                                                                                                                                                                                                                                                                                                                                                                                                                                                                                                                                                                                                                                                                                                                                                                                                                                                                                                              |                                             |                                             |                                             |                                             |                                             |                                             |                                             |                                             |                                             |
| <b>Readmission</b>                                                                                                                                                                                                                                                                                                                                                                                                                                                                                                                                                                                                                                                                                                                                                                                                                                                                                                                                                                                                                                                                                                                                                                                                                                                                                                                                                                                                                                                                                                                                                                                                                                                                                                                                                                                                                                                                                                                                                      | 1.19                                        | 0.11                                        | -0.16                                       | -1.4                                        | -1.79                                       | -1.36                                       | 2.85                                        | 1.41                                        | 0.63                                        |
|                                                                                                                                                                                                                                                                                                                                                                                                                                                                                                                                                                                                                                                                                                                                                                                                                                                                                                                                                                                                                                                                                                                                                                                                                                                                                                                                                                                                                                                                                                                                                                                                                                                                                                                                                                                                                                                                                                                                                                         | (-0.41<br>2.78)                             | (-1.78<br>2.01)                             | (-2.04<br>1.72)                             | (-3.06<br>0.27)                             | (-4.71<br>1.12)                             | (-4.3<br>1.58)                              | (1.24<br>4.46)                              | (-0.28<br>3.31)                             | (-1.68<br>2.95)                             |
|                                                                                                                                                                                                                                                                                                                                                                                                                                                                                                                                                                                                                                                                                                                                                                                                                                                                                                                                                                                                                                                                                                                                                                                                                                                                                                                                                                                                                                                                                                                                                                                                                                                                                                                                                                                                                                                                                                                                                                         | <i>0.14</i>                                 | <i>0.9</i>                                  | <i>0.86</i>                                 | <i>0.10</i>                                 | <i>0.21</i>                                 | <i>0.34</i>                                 | <i>0.001**</i>                              | <i>0.10</i>                                 | <i>0.57</i>                                 |
| <b>ED/Obs</b>                                                                                                                                                                                                                                                                                                                                                                                                                                                                                                                                                                                                                                                                                                                                                                                                                                                                                                                                                                                                                                                                                                                                                                                                                                                                                                                                                                                                                                                                                                                                                                                                                                                                                                                                                                                                                                                                                                                                                           | -1.17                                       | 0.04                                        | -0.56                                       | 1.35                                        | 1.99                                        | 0.73                                        | -2.79                                       | -1.24                                       | -1.44                                       |
|                                                                                                                                                                                                                                                                                                                                                                                                                                                                                                                                                                                                                                                                                                                                                                                                                                                                                                                                                                                                                                                                                                                                                                                                                                                                                                                                                                                                                                                                                                                                                                                                                                                                                                                                                                                                                                                                                                                                                                         | (-2.86<br>0.53)                             | (-1.19<br>1.27)                             | (-1.98<br>0.86)                             | (-0.60<br>3.31)                             | (0.60<br>3.37)                              | (-1.12<br>2.59)                             | (-4.52<br>-1.06)                            | (-2.45<br>-0.04)                            | (-3.04<br>0.16)                             |
|                                                                                                                                                                                                                                                                                                                                                                                                                                                                                                                                                                                                                                                                                                                                                                                                                                                                                                                                                                                                                                                                                                                                                                                                                                                                                                                                                                                                                                                                                                                                                                                                                                                                                                                                                                                                                                                                                                                                                                         | <i>0.17</i>                                 | <i>0.95</i>                                 | <i>0.42</i>                                 | <i>0.16</i>                                 | <i>0.005**</i>                              | <i>0.42</i>                                 | <i>0.002**</i>                              | <i>0.04*</i>                                | <i>0.07</i>                                 |
| <b>TPP</b>                                                                                                                                                                                                                                                                                                                                                                                                                                                                                                                                                                                                                                                                                                                                                                                                                                                                                                                                                                                                                                                                                                                                                                                                                                                                                                                                                                                                                                                                                                                                                                                                                                                                                                                                                                                                                                                                                                                                                              |                                             |                                             |                                             |                                             |                                             |                                             |                                             |                                             |                                             |
| <b>Readmission</b>                                                                                                                                                                                                                                                                                                                                                                                                                                                                                                                                                                                                                                                                                                                                                                                                                                                                                                                                                                                                                                                                                                                                                                                                                                                                                                                                                                                                                                                                                                                                                                                                                                                                                                                                                                                                                                                                                                                                                      | 0.36                                        | -1.04                                       | 0.11                                        | -2.46                                       | -3.44                                       | -0.63                                       | 2.13                                        | 0.59                                        | 0.59                                        |
|                                                                                                                                                                                                                                                                                                                                                                                                                                                                                                                                                                                                                                                                                                                                                                                                                                                                                                                                                                                                                                                                                                                                                                                                                                                                                                                                                                                                                                                                                                                                                                                                                                                                                                                                                                                                                                                                                                                                                                         | (-1.63<br>2.36)                             | (-2.99<br>0.90)                             | (-1.84<br>2.08)                             | (-4.00<br>-0.93)                            | (-5.59<br>-1.3)                             | (-3.31<br>2.04)                             | (-0.25<br>4.52)                             | (-1.68<br>2.86)                             | (-2.03<br>3.21)                             |
|                                                                                                                                                                                                                                                                                                                                                                                                                                                                                                                                                                                                                                                                                                                                                                                                                                                                                                                                                                                                                                                                                                                                                                                                                                                                                                                                                                                                                                                                                                                                                                                                                                                                                                                                                                                                                                                                                                                                                                         | <i>0.71</i>                                 | <i>0.27</i>                                 | <i>0.91</i>                                 | <i>0.002**</i>                              | <i>0.004**</i>                              | <i>0.62</i>                                 | <i>0.08</i>                                 | <i>0.59</i>                                 | <i>0.64</i>                                 |
| <b>ED/Obs</b>                                                                                                                                                                                                                                                                                                                                                                                                                                                                                                                                                                                                                                                                                                                                                                                                                                                                                                                                                                                                                                                                                                                                                                                                                                                                                                                                                                                                                                                                                                                                                                                                                                                                                                                                                                                                                                                                                                                                                           | -0.93                                       | -0.37                                       | -0.83                                       | 1.45                                        | 1.32                                        | 0.53                                        | -2.45                                       | -1.51                                       | -1.77                                       |
|                                                                                                                                                                                                                                                                                                                                                                                                                                                                                                                                                                                                                                                                                                                                                                                                                                                                                                                                                                                                                                                                                                                                                                                                                                                                                                                                                                                                                                                                                                                                                                                                                                                                                                                                                                                                                                                                                                                                                                         | (-2.62<br>0.76)                             | (-1.66<br>0.92)                             | (-2.40<br>0.73)                             | (-0.73<br>3.62)                             | (0.11<br>2.54)                              | (-1.16<br>2.21)                             | (-4.14<br>-0.76)                            | (-3.04<br>0.02)                             | (-3.63<br>0.08)                             |
|                                                                                                                                                                                                                                                                                                                                                                                                                                                                                                                                                                                                                                                                                                                                                                                                                                                                                                                                                                                                                                                                                                                                                                                                                                                                                                                                                                                                                                                                                                                                                                                                                                                                                                                                                                                                                                                                                                                                                                         | <i>0.26</i>                                 | <i>0.55</i>                                 | <i>0.28</i>                                 | <i>0.18</i>                                 | <i>0.03*</i>                                | <i>0.52</i>                                 | <i>0.005**</i>                              | <i>0.05</i>                                 | <i>0.06</i>                                 |
| <p>Abbreviations: "Difference." = fully adjusted difference between intervention (I) and control units (C); "Readmission" = Inpatient readmission; ED/Obs" = Emergency Department / Observation visit; "ITT" = Intent to treat; "TPP" = treated per protocol.</p> <p>a READI1: Readiness Evaluation And Discharge Interventions Protocol 1: Nurse assessment using nurse form of the Readiness for Hospital Discharge Scale with instruction to nurses to use their best judgment with the assessment information to guide actions in completing their patients' preparation for discharge .</p> <p>b READI2: Readiness Evaluation And Discharge Interventions Protocol 2: Patient self-assessment using the patient form of the Readiness for Hospital Discharge Scale followed by nurse assessment using the nurse form of the Readiness for Hospital Discharge Scale with instruction to nurses to use their best judgment with the assessment information to guide actions in completing their patients' preparation for discharge .</p> <p>c READI3: Readiness Evaluation And Discharge Interventions Protocol 3: Patient self-assessment using the patient form of the Readiness for Hospital Discharge Scale followed by nurse assessment using the nurse form of the Readiness for Hospital Discharge Scale with instruction to nurses to act and document nurse actions if low readiness score (&lt;7) on nurse or patient form.</p> <p>d Adjusted for baseline and patient characteristics. Rates expressed per 100 index patient discharges. Adjusted rates and adjusted difference in rates were estimated using a multinomial logistic regression with adjustment for baseline event rates and patient characteristics and clustering at unit and hospital level.</p> <p>‡ ED/Obs: Emergency Department visit or Observation stay with no record of readmission. ED and Observation were combined as return to hospital without inpatient readmission.</p> |                                             |                                             |                                             |                                             |                                             |                                             |                                             |                                             |                                             |

**eTable 5. Robustness of 30-day results for units without a formal discharge model of care in place prior to READI study (ITT n=71,002; TPP n=56,252)**

|                                                                                                                                                                                                                                                                                                                                                                                                                                                                                                                                                                                                                                                                                                                                                                                                                                                                                                                                                                                                                                                                                                                                                                                                                                                                                                                                                                                                                                                                                                                                                                                                                                                                                                                                                                                                                                                                                                                                                                        | ALL                                |                                    |                                    | High-readmission units             |                                    |                                    | Low-readmission units              |                                    |                                    |
|------------------------------------------------------------------------------------------------------------------------------------------------------------------------------------------------------------------------------------------------------------------------------------------------------------------------------------------------------------------------------------------------------------------------------------------------------------------------------------------------------------------------------------------------------------------------------------------------------------------------------------------------------------------------------------------------------------------------------------------------------------------------------------------------------------------------------------------------------------------------------------------------------------------------------------------------------------------------------------------------------------------------------------------------------------------------------------------------------------------------------------------------------------------------------------------------------------------------------------------------------------------------------------------------------------------------------------------------------------------------------------------------------------------------------------------------------------------------------------------------------------------------------------------------------------------------------------------------------------------------------------------------------------------------------------------------------------------------------------------------------------------------------------------------------------------------------------------------------------------------------------------------------------------------------------------------------------------------|------------------------------------|------------------------------------|------------------------------------|------------------------------------|------------------------------------|------------------------------------|------------------------------------|------------------------------------|------------------------------------|
|                                                                                                                                                                                                                                                                                                                                                                                                                                                                                                                                                                                                                                                                                                                                                                                                                                                                                                                                                                                                                                                                                                                                                                                                                                                                                                                                                                                                                                                                                                                                                                                                                                                                                                                                                                                                                                                                                                                                                                        | READI1 <sup>a</sup>                | READI2 <sup>b</sup>                | READI3 <sup>c</sup>                | READI1 <sup>a</sup>                | READI2 <sup>b</sup>                | READI3 <sup>c</sup>                | READI1 <sup>a</sup>                | READI2 <sup>b</sup>                | READI3 <sup>c</sup>                |
|                                                                                                                                                                                                                                                                                                                                                                                                                                                                                                                                                                                                                                                                                                                                                                                                                                                                                                                                                                                                                                                                                                                                                                                                                                                                                                                                                                                                                                                                                                                                                                                                                                                                                                                                                                                                                                                                                                                                                                        | Difference<br>(95% CI)<br><i>P</i> | Difference<br>(95% CI)<br><i>P</i> | Difference<br>(95% CI)<br><i>P</i> | Difference<br>(95% CI)<br><i>P</i> | Difference<br>(95% CI)<br><i>P</i> | Difference<br>(95% CI)<br><i>P</i> | Difference<br>(95% CI)<br><i>P</i> | Difference<br>(95% CI)<br><i>P</i> | Difference<br>(95% CI)<br><i>P</i> |
| <b>ITT</b>                                                                                                                                                                                                                                                                                                                                                                                                                                                                                                                                                                                                                                                                                                                                                                                                                                                                                                                                                                                                                                                                                                                                                                                                                                                                                                                                                                                                                                                                                                                                                                                                                                                                                                                                                                                                                                                                                                                                                             |                                    |                                    |                                    |                                    |                                    |                                    |                                    |                                    |                                    |
| <b>Readmission</b>                                                                                                                                                                                                                                                                                                                                                                                                                                                                                                                                                                                                                                                                                                                                                                                                                                                                                                                                                                                                                                                                                                                                                                                                                                                                                                                                                                                                                                                                                                                                                                                                                                                                                                                                                                                                                                                                                                                                                     | 0.72                               | -1.04                              | 1.23                               | -0.26                              | -2.14                              | 1.55                               | 2.06                               | 0.59                               | 0.85                               |
|                                                                                                                                                                                                                                                                                                                                                                                                                                                                                                                                                                                                                                                                                                                                                                                                                                                                                                                                                                                                                                                                                                                                                                                                                                                                                                                                                                                                                                                                                                                                                                                                                                                                                                                                                                                                                                                                                                                                                                        | (-0.71<br>2.15)                    | (-2.52<br>0.44)                    | (0.04<br>2.42)                     | (-1.75<br>1.23)                    | (-3.82<br>-0.47)                   | (0.14<br>2.95)                     | (0.00<br>4.12)                     | (-1.27<br>2.45)                    | (-0.99<br>2.68)                    |
|                                                                                                                                                                                                                                                                                                                                                                                                                                                                                                                                                                                                                                                                                                                                                                                                                                                                                                                                                                                                                                                                                                                                                                                                                                                                                                                                                                                                                                                                                                                                                                                                                                                                                                                                                                                                                                                                                                                                                                        | <i>0.30</i>                        | <i>0.16</i>                        | <i>0.04*</i>                       | <i>0.72</i>                        | <i>0.02*</i>                       | <i>0.03*</i>                       | <i>0.05*</i>                       | <i>0.51</i>                        | <i>0.34</i>                        |
| <b>ED/Obs</b>                                                                                                                                                                                                                                                                                                                                                                                                                                                                                                                                                                                                                                                                                                                                                                                                                                                                                                                                                                                                                                                                                                                                                                                                                                                                                                                                                                                                                                                                                                                                                                                                                                                                                                                                                                                                                                                                                                                                                          | -0.97                              | -0.24                              | -0.51                              | -0.44                              | 0.31                               | 0.08                               | -1.74                              | -1.11                              | -1.39                              |
|                                                                                                                                                                                                                                                                                                                                                                                                                                                                                                                                                                                                                                                                                                                                                                                                                                                                                                                                                                                                                                                                                                                                                                                                                                                                                                                                                                                                                                                                                                                                                                                                                                                                                                                                                                                                                                                                                                                                                                        | (-2.6<br>0.66)                     | (-1.92<br>1.43)                    | (-1.83<br>0.81)                    | (-2.61<br>1.73)                    | (-2.08<br>2.71)                    | (-1.09<br>1.24)                    | (-3.42<br>-0.06)                   | (-3.24<br>1.02)                    | (-3.6<br>0.82)                     |
|                                                                                                                                                                                                                                                                                                                                                                                                                                                                                                                                                                                                                                                                                                                                                                                                                                                                                                                                                                                                                                                                                                                                                                                                                                                                                                                                                                                                                                                                                                                                                                                                                                                                                                                                                                                                                                                                                                                                                                        | <i>0.23</i>                        | <i>0.76</i>                        | <i>0.42</i>                        | <i>0.67</i>                        | <i>0.78</i>                        | <i>0.89</i>                        | <i>0.04*</i>                       | <i>0.29</i>                        | <i>0.20</i>                        |
| <b>TPP</b>                                                                                                                                                                                                                                                                                                                                                                                                                                                                                                                                                                                                                                                                                                                                                                                                                                                                                                                                                                                                                                                                                                                                                                                                                                                                                                                                                                                                                                                                                                                                                                                                                                                                                                                                                                                                                                                                                                                                                             |                                    |                                    |                                    |                                    |                                    |                                    |                                    |                                    |                                    |
| <b>Readmission</b>                                                                                                                                                                                                                                                                                                                                                                                                                                                                                                                                                                                                                                                                                                                                                                                                                                                                                                                                                                                                                                                                                                                                                                                                                                                                                                                                                                                                                                                                                                                                                                                                                                                                                                                                                                                                                                                                                                                                                     | 0.5                                | -1.4                               | 1.13                               | -0.63                              | -2.79                              | 1.11                               | 1.85                               | 0.64                               | 1.14                               |
|                                                                                                                                                                                                                                                                                                                                                                                                                                                                                                                                                                                                                                                                                                                                                                                                                                                                                                                                                                                                                                                                                                                                                                                                                                                                                                                                                                                                                                                                                                                                                                                                                                                                                                                                                                                                                                                                                                                                                                        | (-1.16<br>2.16)                    | (-3.02<br>0.22)                    | (-0.33<br>2.57)                    | (-2.49<br>1.22)                    | (-4.85<br>-0.72)                   | (-0.76<br>2.99)                    | (-0.31<br>4.01)                    | (-1.14<br>2.41)                    | (-0.94<br>3.21)                    |
|                                                                                                                                                                                                                                                                                                                                                                                                                                                                                                                                                                                                                                                                                                                                                                                                                                                                                                                                                                                                                                                                                                                                                                                                                                                                                                                                                                                                                                                                                                                                                                                                                                                                                                                                                                                                                                                                                                                                                                        | <i>0.53</i>                        | <i>0.09</i>                        | <i>0.12</i>                        | <i>0.48</i>                        | <i>0.01*</i>                       | <i>0.23</i>                        | <i>0.09</i>                        | <i>0.46</i>                        | <i>0.26</i>                        |
| <b>ED/Obs</b>                                                                                                                                                                                                                                                                                                                                                                                                                                                                                                                                                                                                                                                                                                                                                                                                                                                                                                                                                                                                                                                                                                                                                                                                                                                                                                                                                                                                                                                                                                                                                                                                                                                                                                                                                                                                                                                                                                                                                          | -1.23                              | -0.73                              | -0.57                              | -0.7                               | -0.09                              | -0.25                              | -1.87                              | -1.65                              | -1.17                              |
|                                                                                                                                                                                                                                                                                                                                                                                                                                                                                                                                                                                                                                                                                                                                                                                                                                                                                                                                                                                                                                                                                                                                                                                                                                                                                                                                                                                                                                                                                                                                                                                                                                                                                                                                                                                                                                                                                                                                                                        | (-3.16<br>0.69)                    | (-2.67<br>1.21)                    | (-2.15<br>1.00)                    | (-3.49<br>2.08)                    | (-2.98<br>2.81)                    | (-1.70<br>1.20)                    | (-3.51<br>-0.23)                   | (-3.98<br>0.68)                    | (-4.04<br>1.71)                    |
|                                                                                                                                                                                                                                                                                                                                                                                                                                                                                                                                                                                                                                                                                                                                                                                                                                                                                                                                                                                                                                                                                                                                                                                                                                                                                                                                                                                                                                                                                                                                                                                                                                                                                                                                                                                                                                                                                                                                                                        | <i>0.19</i>                        | <i>0.44</i>                        | <i>0.45</i>                        | <i>0.6</i>                         | <i>0.95</i>                        | <i>0.72</i>                        | <i>0.03*</i>                       | <i>0.15</i>                        | <i>0.4</i>                         |
| <p>Abbreviations: "Difference." = fully adjusted difference between intervention (I) and control units (C); "Readmission" = Inpatient readmission; ED/Obs = Emergency Department / Observation visit; "ITT" = Intent to treat; "TPP" = treated per protocol.</p> <p>a READI1: Readiness Evaluation And Discharge Interventions Protocol 1: Nurse assessment using nurse form of the Readiness for Hospital Discharge Scale with instruction to nurses to use their best judgment with the assessment information to guide actions in completing their patients' preparation for discharge .</p> <p>b READI2: Readiness Evaluation And Discharge Interventions Protocol 2: Patient self-assessment using the patient form of the Readiness for Hospital Discharge Scale followed by nurse assessment using the nurse form of the Readiness for Hospital Discharge Scale with instruction to nurses to use their best judgment with the assessment information to guide actions in completing their patients' preparation for discharge .</p> <p>c READI3: Readiness Evaluation And Discharge Interventions Protocol 3: Patient self-assessment using the patient form of the Readiness for Hospital Discharge Scale followed by nurse assessment using the nurse form of the Readiness for Hospital Discharge Scale with instruction to nurses to act and document nurse actions if low readiness score (&lt;7) on nurse or patient form.</p> <p>d Adjusted for baseline and patient characteristics. Rates expressed per 100 index patient discharges. Adjusted rates and adjusted difference in rates were estimated using a multinomial logistic regression with adjustment for baseline event rates and patient characteristics and clustering at unit and hospital level.</p> <p>‡ ED/Obs: Emergency Department visit or Observation stay with no record of readmission. ED and Observation were combined as return to hospital without inpatient readmission.</p> |                                    |                                    |                                    |                                    |                                    |                                    |                                    |                                    |                                    |
